# Supplementary material
Source: Springer Nature journal article supplement (https://www.springermedizin.de/resource/supplementary/12889_2008_1520_MOESM3_ESM.pdf/9503332)

$R = 1.5$

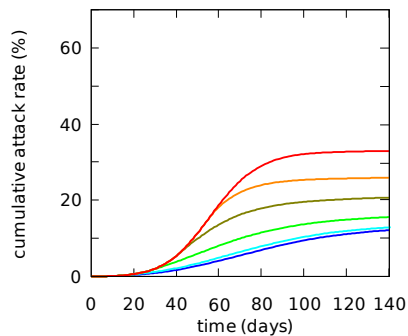

$R = 2.5$

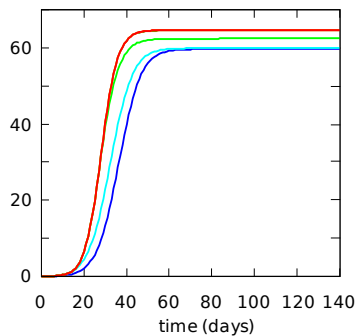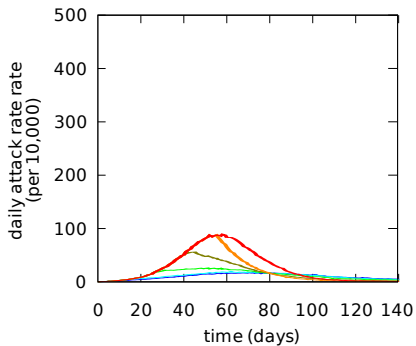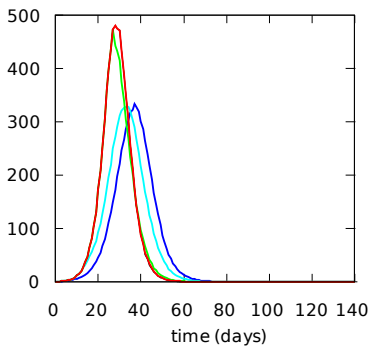

pre-emptive intervention 

2 week delay 

4 week delay 

6 week delay 

8 week delay 

no intervention 

Supplement: MOESM3 [file 9503332]
